# Supplementary material for: Validation of prognostic scoring systems for patients with metastatic renal cell carcinoma enrolled in phase I clinical trials
Source: PubMed Central journal article supplement — ESMO Open. 2020 Nov 23;5(6):e001073. doi: 10.1136/esmoopen-2020-001073 (PMC7684827; doi:10.1136/esmoopen-2020-001073), 2020-11-23
Supplement: esmoopen-2020-001073supp001.pdf [file esmoopen-2020-001073supp001.pdf]

| IMDC score                  |                        | RMH score        |                        | MDACC score        |                        |
|-----------------------------|------------------------|------------------|------------------------|--------------------|------------------------|
| Factor                      | Poor prognostic factor | Factor           | Poor prognostic factor | Factor             | Poor prognostic factor |
| HGB                         | < LLN                  | Albumin          | < 3.5 g/dL             | Albumin            | < 3.5 g/dL             |
| Plts                        | > ULN                  | LDH              | > ULN                  | LDH                | > ULN                  |
| ANC                         | > ULN                  | Metastatic sites | ≥ 3 sites              | Metastatic sites   | ≥ 3 sites              |
| KPS                         | < 80%                  | -                | -                      | ECOG PS            | ≥ 1                    |
| Corrected calcium           | > ULN                  | -                | -                      | Primary tumor site | Gastrointestinal       |
| Dx to systemic tx           | < 1 year               |                  |                        |                    |                        |
| IMDC risk group definitions |                        |                  |                        |                    |                        |
| Favorable                   | 0 factors              |                  |                        |                    |                        |
| Intermediate                | 1-2 factors            |                  |                        |                    |                        |
| Poor                        | ≥ 3 factors            |                  |                        |                    |                        |

**Supplemental Table 1:** Definitions of the IMDC, RMH, and MDACC prognostic scores

**Supplemental Table 1 Legend:** HGB = hemoglobin, LLN = lower limit of normal, g = grams, dL = deciliter, Plts = platelets, ULN = upper limit of normal, LDH = lactate dehydrogenase, ANC = absolute neutrophil count, ECOG = Eastern Cooperative Oncology Group, PS = performance status, KPS = Karnofsky performance status, Dx = diagnosis, tx = treatment

| <b>Mechanism of action</b>                                  |
|-------------------------------------------------------------|
| Anti-CSF1R + PD-1 checkpoint inhibitor                      |
| Arginase inhibitor                                          |
| BET inhibitor                                               |
| CCR-4 inhibitor                                             |
| Coenzyme Q10 + gemcitabine                                  |
| CTLA-4 inhibitor + TLR9 agonist                             |
| Exportin inhibitor + PD-1 checkpoint inhibitor              |
| EZH2 inhibitor + CTLA-4 checkpoint inhibitor                |
| Glutaminase inhibitor                                       |
| Glutaminase inhibitor + mTOR inhibitor                      |
| Glutaminase inhibitor + multi-target angiogenesis TKI       |
| Glutaminase inhibitor + PARP inhibitor                      |
| Glutaminase inhibitor + PD-1 checkpoint inhibitor           |
| ICOS monoclonal antibody                                    |
| IDO-1 inhibitor + JAK inhibitor                             |
| MDM2 inhibitor                                              |
| mTOR inhibitor + carboplatin + paclitaxel                   |
| Multi-target angiogenesis TKI                               |
| Multi-target TKI + mTOR inhibitor                           |
| Nanoparticle drug conjugate + VEGF targeted therapy         |
| PARP inhibitor                                              |
| PARP inhibitor + ATM inhibitor + cisplatin                  |
| PD-1 checkpoint inhibitor                                   |
| PD-1 checkpoint inhibitor + CTLA-4 checkpoint inhibitor     |
| PD-1 checkpoint inhibitor + cyclophosphamide                |
| PD-1 checkpoint inhibitor + enterococcus                    |
| PD-1 checkpoint inhibitor + LAG-3 checkpoint inhibitor      |
| PD-L1 checkpoint inhibitor + 4-1BB agonist + OX40 inhibitor |
| Pegylated IL-10 + PD-1 checkpoint inhibitor                 |
| PI3K inhibitor                                              |
| Proteasome inhibitor + VEGF targeted therapy                |
| Proteasome inhibitor + HDAC inhibitor                       |
| STING pathway agonist                                       |

**Supplemental Table 2:** Mechanisms of action of agents in phase 1 trials enrolling patients in the present study

**Supplemental Table 2 Legend:** TKI = tyrosine kinase inhibitor

| Study                       | Population                     | Treatment(s)                | OS              | PFS           | ORR        |
|-----------------------------|--------------------------------|-----------------------------|-----------------|---------------|------------|
| Ko, et al <sup>18</sup>     | IMDC, second-line              | VEGF or mTOR inhibitor      | 12.5 m          | 3.9 m         | N/A        |
| Wells, et al <sup>20</sup>  | IMDC, third-line               | VEGF or mTOR inhibitor      | 12.4 m          | 3.9 m         | 10.4%      |
| METEOR <sup>25</sup>        | mccRCC after ≥ 1 prior VEGF TT | Cabozantinib vs. everolimus | 21.4 vs. 16.5 m | 7.4 vs. 3.9 m | 17% vs. 3% |
| CheckMate 025 <sup>26</sup> | mccRCC after 1-3 prior lines   | Nivolumab vs. everolimus    | 25.0 vs. 19.6 m | 4.6 vs. 4.4 m | 25% vs. 5% |
| Hahn, et al                 | MDACC, median third-line*      | Phase 1 clinical trial      | 31.2 m          | 5.9 m         | 22%        |

**Supplemental Table 3:** Clinical outcomes for second-line or later treatment of metastatic renal cell carcinoma from select population-based studies and clinical trials.

**Supplemental Table 3 Legend:** OS = overall survival, PFS = progression-free survival, ORR = objective response rate, IMDC = International Metastatic RCC Database Consortium, VEGF = vascular endothelial growth factor, mTOR = mammalian target of Rapamycin, \* = median third-line, but range from 0-9 prior lines of treatment.
