# Supplementary figures and images for: Validation of prognostic scoring systems for patients with metastatic renal cell carcinoma enrolled in phase I clinical trials
Source: PubMed Central journal article supplement — ESMO Open. 2020 Nov 23;5(6):e001073. doi: 10.1136/esmoopen-2020-001073 (PMC7684827; doi:10.1136/esmoopen-2020-001073), 2020-11-23

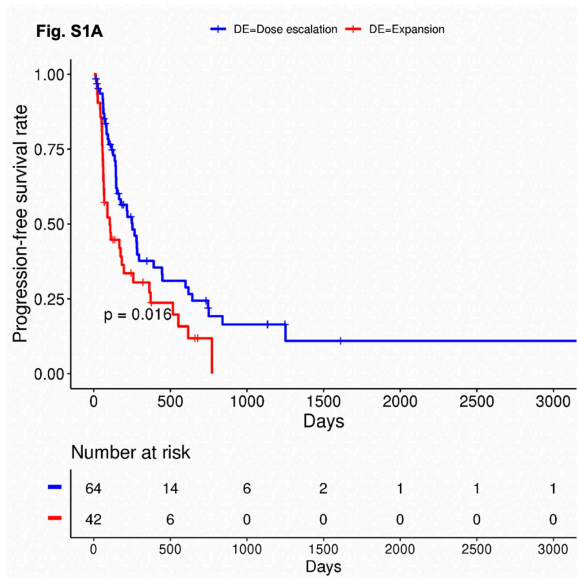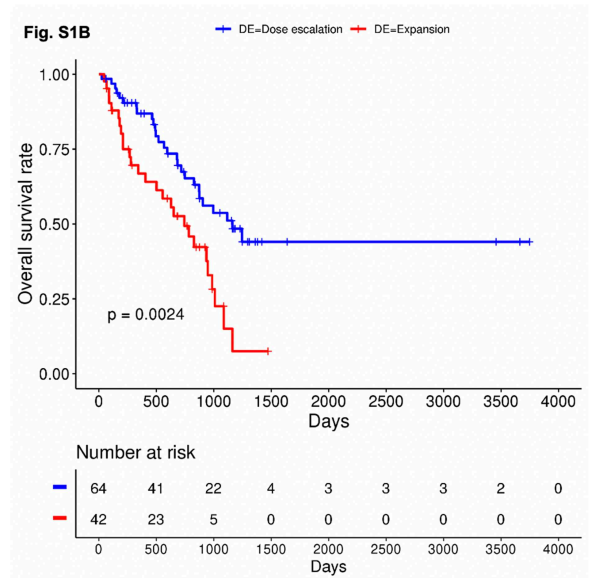

Supplement: esmoopen-2020-001073supp002.pdf [file esmoopen-2020-001073supp002.pdf]
